# Supplementary material
Source: PubMed Central journal article supplement (PMC8776513)
Supplement: NIHMS1007815-supplement-Supp_TableS1.pdf [file NIHMS1007815-supplement-Supp_TableS1.pdf]

Supplementary Table SI: Adverse events on maintenance lenalidomide

| Adverse Event        | Total (N = 13)      |                     |
|----------------------|---------------------|---------------------|
|                      | Grade 1-2,<br>n (%) | Grade 3-4,<br>n (%) |
| Non-hematologic      |                     |                     |
| Fatigue              | 4 (31)              | 1 (8)               |
| Rash                 | 5 (38)              | 0                   |
| Diarrhea             | 2 (15)              | 0                   |
| Acute kidney injury  | 1 (8)               | 1 (8)               |
| Deep vein thrombosis | 0                   | 1 (8)               |
| Pneumonia            | 0                   | 1 (8)               |
| Hemorrhage*          | 0                   | 1 (8)               |
| Arthralgia           | 1 (8)               | 0                   |
| Hematologic          |                     |                     |
| Neutropenia          | 6 (46)              | 1 (8)               |
| Anemia               | 5 (38)              | 2 (15)              |
| Thrombocytopenia     | 5 (38)              | 0                   |

\*Patient developed grade 3 subdural hematoma within 1 month of starting lenalidomide, likely related to aspirin.

**Table SI. Toxicities Associated with Low-Dose Lenalidomide Maintenance in Older Patients with PCNSL**

Five toxicities mandated cessation of lenalidomide maintenance. Patient 3 experienced a subdural hematoma within one month, likely related to aspirin. Patient 5 experienced grade 3 fatigue after 21 months of lenalidomide maintenance, prompting cessation of therapy. Patient 6, with a history of polymyalgia rheumatica, experienced recrudescence of grade 2 arthralgias with lenalidomide. Patient 10 developed deep vein thrombosis at 1 year of lenalidomide maintenance but resumed lenalidomide after anticoagulation. Patient 11 (KPS 50 at baseline) developed pneumonia after 8 months of lenalidomide maintenance.
